# Supplementary material for: NMR Structure and Biophysical Characterization of Thermophilic Single-Stranded DNA Binding Protein from Sulfolobus Solfataricus
Source: MDPI journal article supplement (doi:10.3390/ijms23063099), 2022-03-13

# NMR Structure and Biophysical Characterization of Thermophilic Single-stranded DNA Binding Protein from *Sulfolobus solfataricus*

Min June Yang<sup>1</sup>, Jinwoo Kim<sup>1</sup>, Yeongjoon Lee<sup>2</sup>, Woonghee Lee<sup>2,\*</sup>, and Chin-Ju Park<sup>1,\*</sup>

<sup>1</sup> Department of Chemistry, Gwangju Institute of Science and Technology, Gwangju 61005, Korea; [minjune1590@gm.gist.ac.kr](mailto:minjune1590@gm.gist.ac.kr) (M.J.Y.); [wlsdn8810@gist.ac.kr](mailto:wlsdn8810@gist.ac.kr) (J.K.)

<sup>2</sup> Department of Chemistry, University of Colorado Denver, Denver, CO 80217-3364, USA; [bioyj1012@gmail.com](mailto:bioyj1012@gmail.com)

\* Correspondence: [woonghee.lee@ucdenver.edu](mailto:woonghee.lee@ucdenver.edu) (W.L.); [cjpark@gist.ac.kr](mailto:cjpark@gist.ac.kr) (C.-J.P.); Tel.: +1-303-315-7672 (W.L.); +82-62-715-3630 (C.-J.P.)

Figure S1: Results of CD spectroscopy. (A)  $\theta$  value at 190 to 250 nm from CD spectroscopy of SsoSSB<sub>1-114</sub> and SsoSSB<sub>12-114</sub> at 20°C. (B) Molar ellipticity at 228 nm of SsoSSB<sub>1-114</sub> and SsoSSB<sub>12-114</sub> from 20 to 80°C.

Figure S2: Number of distance constraints used for structure calculation. The number of Short-range (Intramolecular and sequential residue) constraints (white), mid-range constraints (cyan), and long-range constraints (red) are marked. The secondary structure from Uniprot showed the top of the graph.

Figure S3: Secondary structure comparison among the high-temperature NMR structure (PDB ID: 7WCG), the X-ray crystal structure (PDB ID: 1O7I), and the room temperature NMR structure in complex with ssDNA (PDB ID: 2MNA). Aromatic residues which are related to DNA binding are indicated in red.

**Figure S4:** (A) The lowest energy structure of SsoSSB<sub>1-114</sub> (PDB ID: 7WCG; The N-terminal part (residue number 1-11) is shown in magenta). (B) The crystal structure of TmaSSB (PDB ID: 1Z9F).

Figure S5:  $T_m$  of hRPA70A measured by DSC.

Figure S6: (A) <sup>1</sup>H-<sup>15</sup>N HSQC of SsoSSB<sub>12-114</sub>. (B) Overlay of <sup>1</sup>H-<sup>15</sup>N HSQC spectra of SsoSSB<sub>1-114</sub> (blue) and SsoSSB<sub>12-114</sub> (red). (C) Overlay of <sup>1</sup>H-<sup>15</sup>N HSQC spectra of SsoSSB<sub>12-114</sub> with ssDNA dA(15) (green), SsoSSB<sub>1-114</sub> (blue), and SsoSSB<sub>12-114</sub> (red). Experiments were performed at 25°C.

Figure S7: Thermodynamic analysis by isothermal titration calorimetry. ssDNA was added to (A) SsoSSB<sub>1-114</sub> and (B) SsoSSB<sub>12-114</sub>. The fitted curve represents a 1 to 1 binding model with the given  $K_d$  and  $n$ .

Figure S1

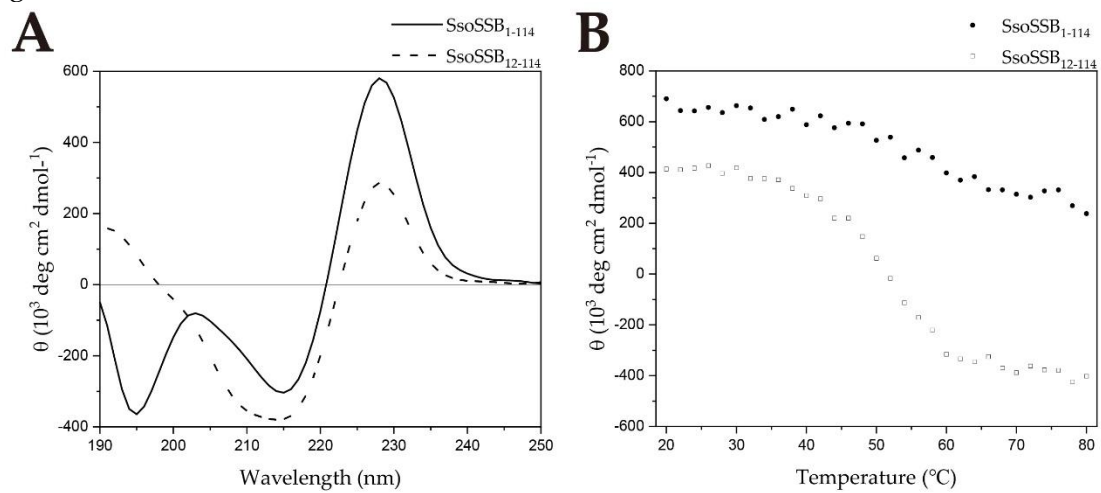

Figure S2

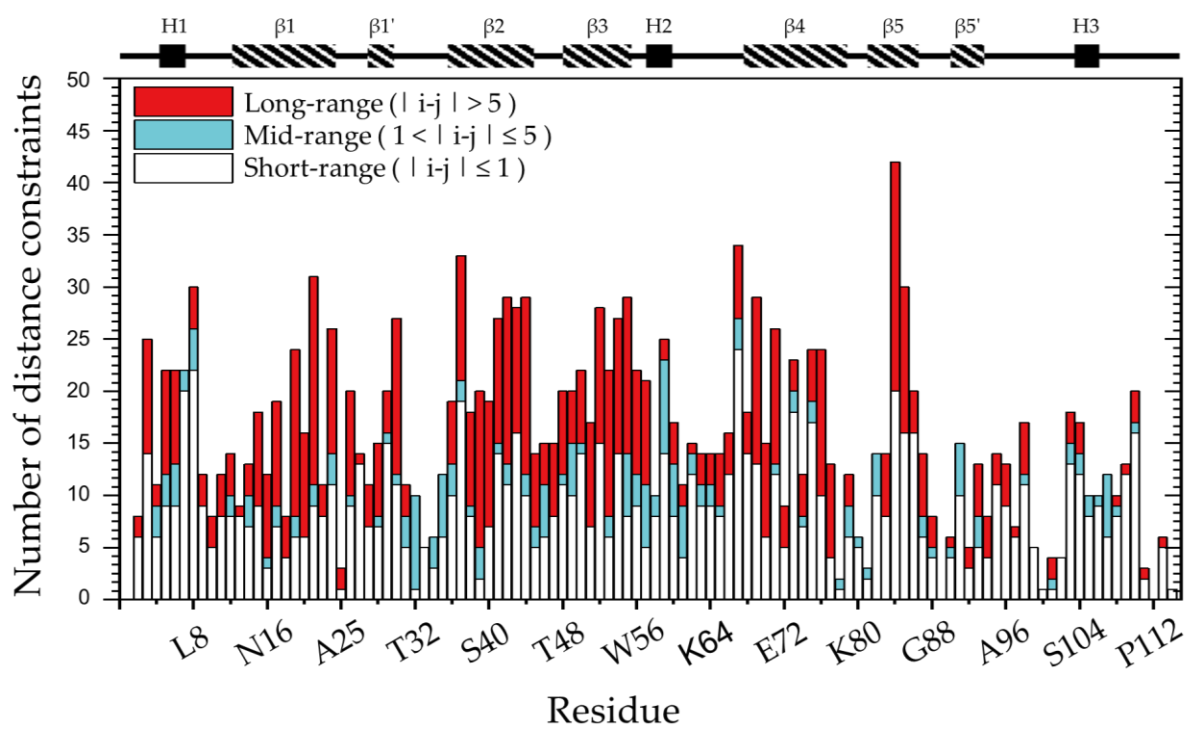

Figure S3

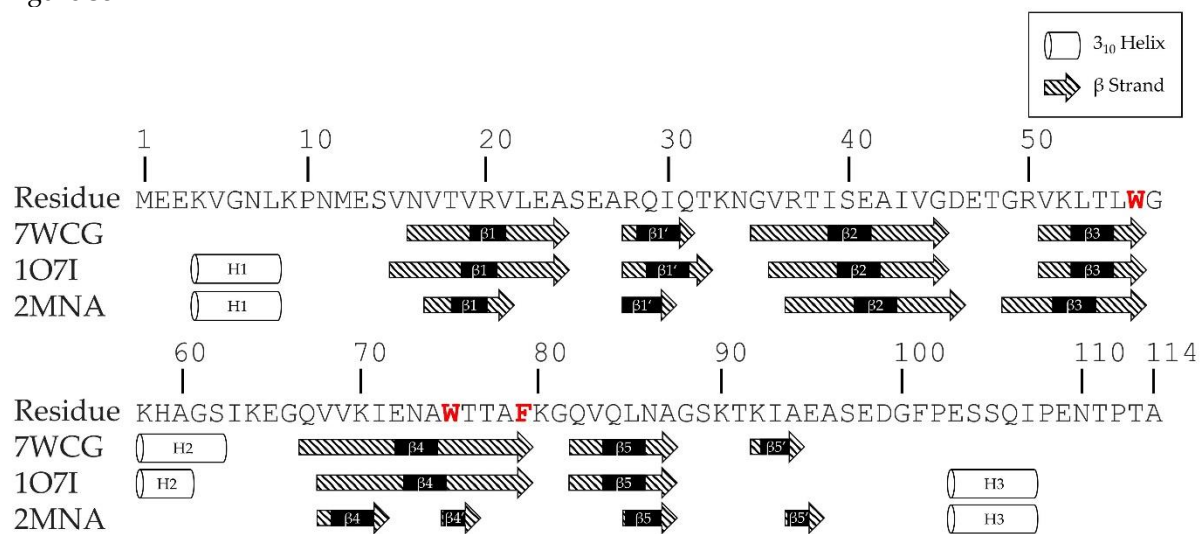

Figure S4

**A**

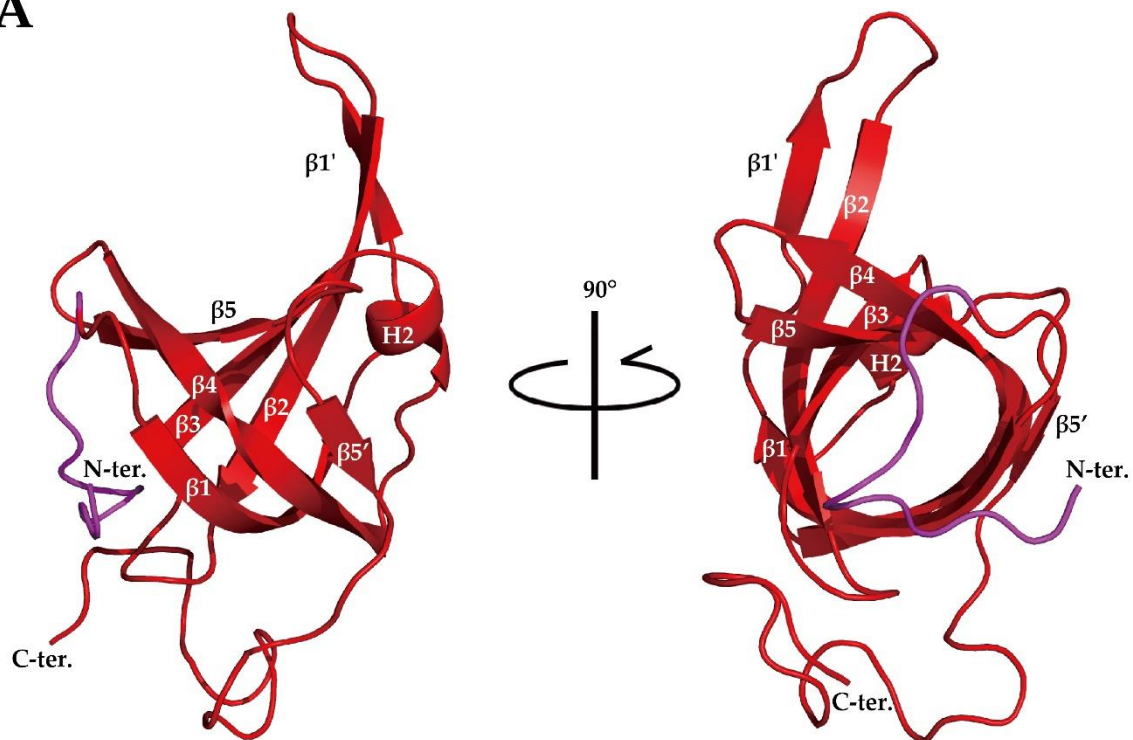

**B**

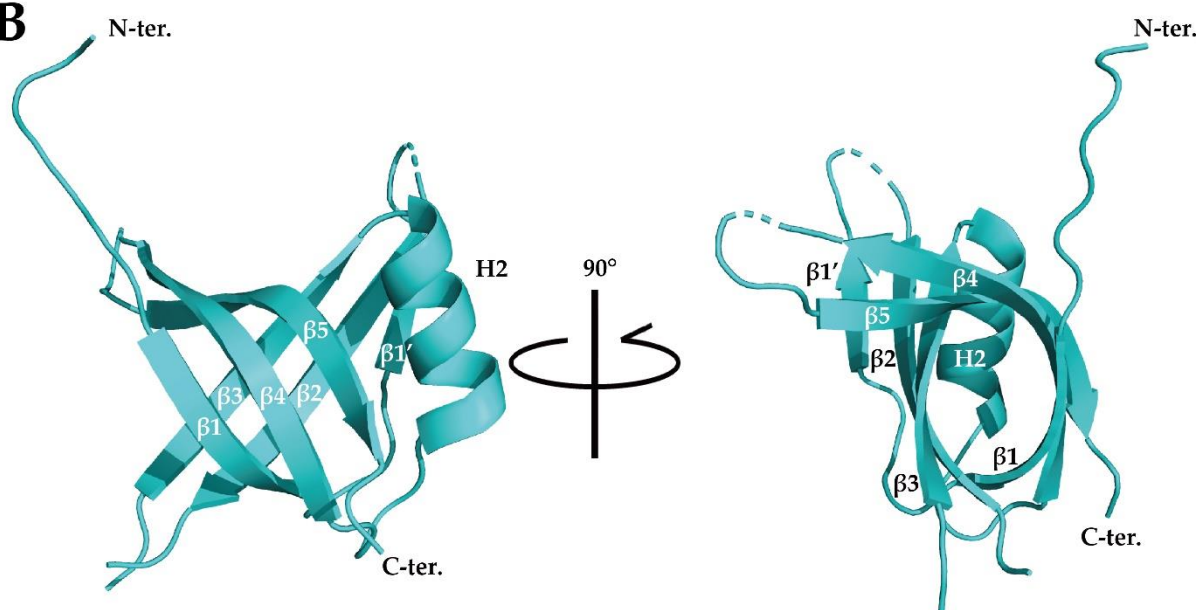

Figure S5

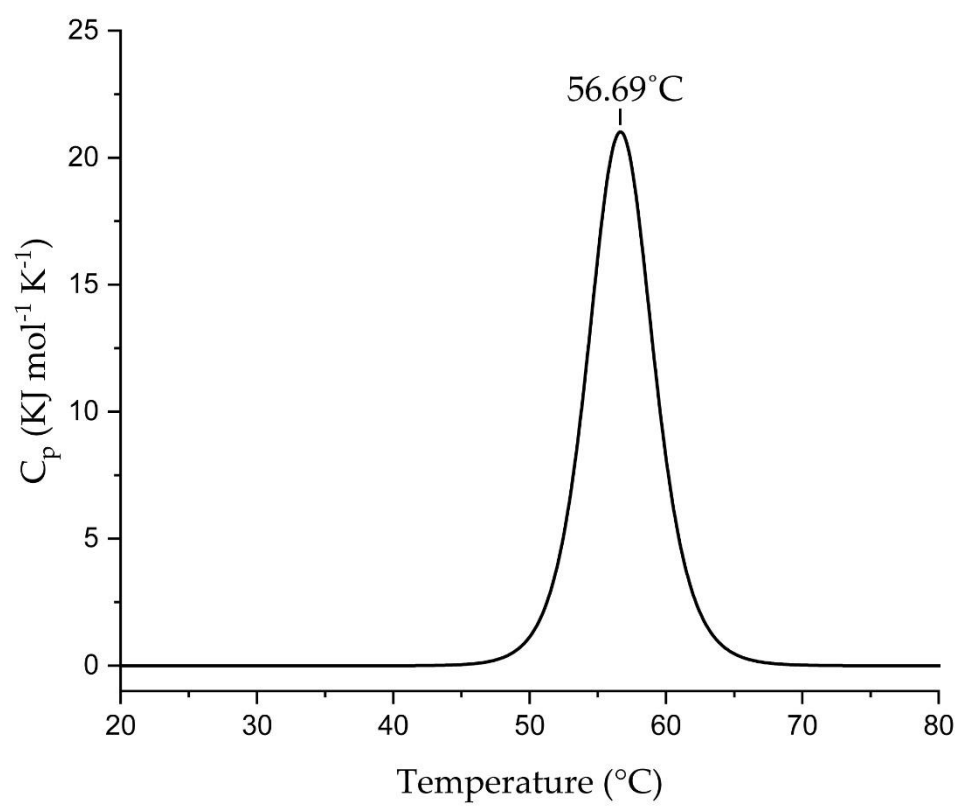

Figure S6

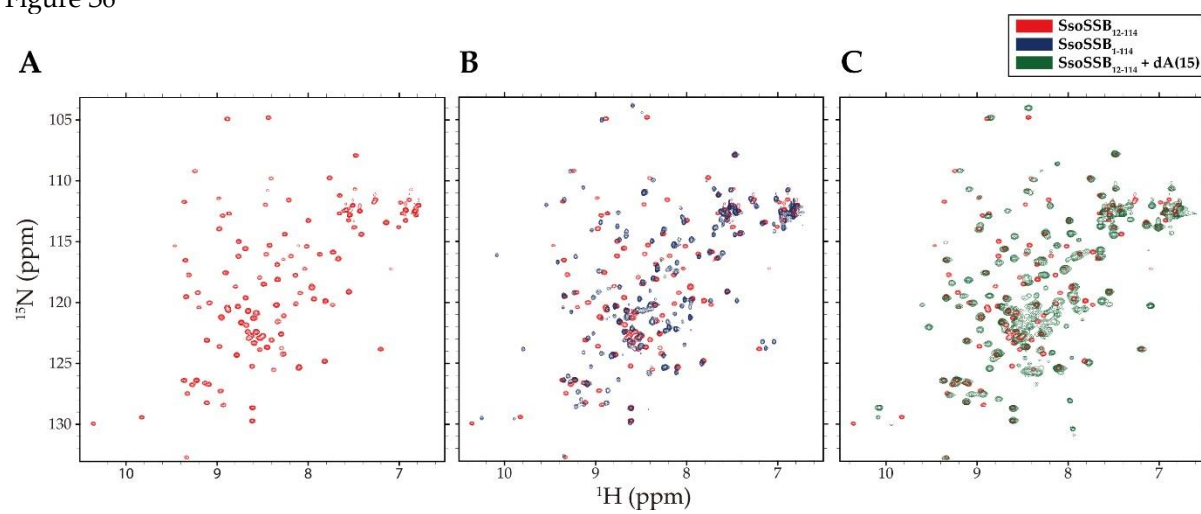

Figure S7

**A**

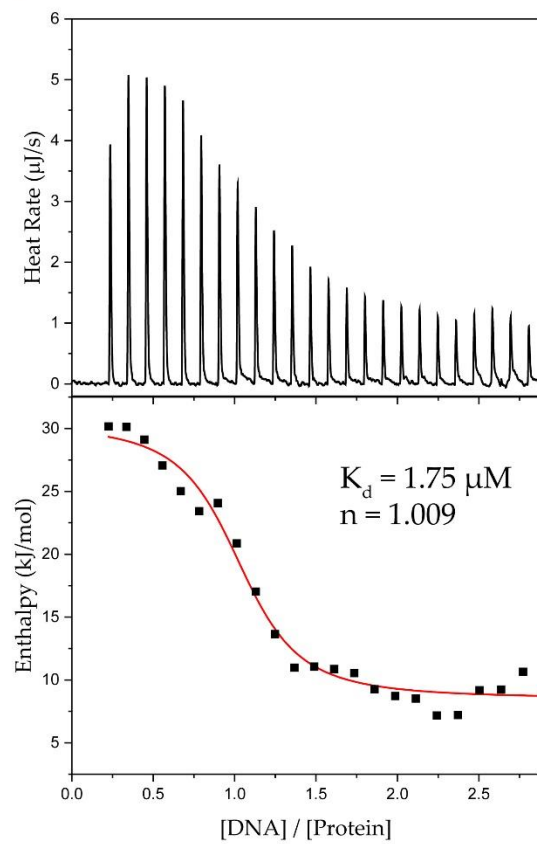

**B**

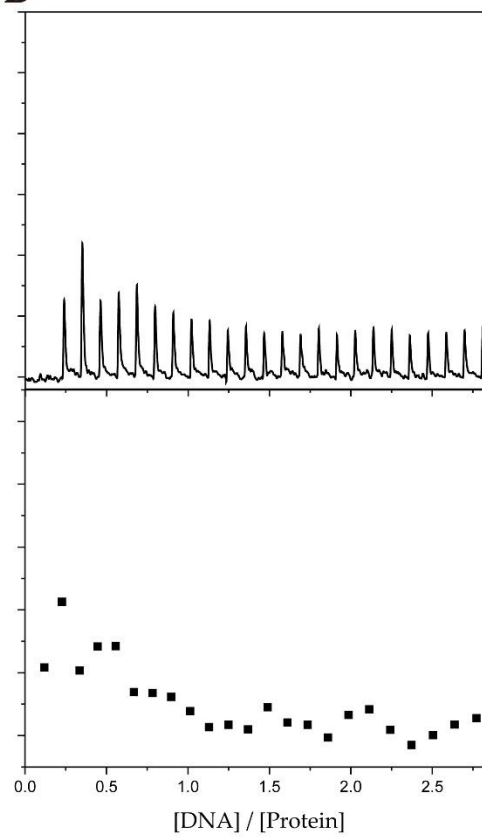

Supplement: s1 [file ijms-1594311-supplementary.pdf › ijms-1594311-supplementary.pdf]
